# Supplementary material for: Quantum design of transition metals decorated on boron phosphide inorganic nanocluster for Favipiravir adsorption: a possible treatment for COVID-19
Source: Royal Society of Chemistry journal article supplement (doi:10.1039/d1nj04697g), 2021-12-21
Supplement: d1nj04697g1.pdf [file d1nj04697g1.pdf]

## Supporting information file

### Quantum Design of Transition Metals Decorated on Boron Phosphide Inorganic Nanocluster for Favipiravir Adsorption: A Possible Treatment for Covid-19

Muhammad Ramzan Saeed Ashraf Janjua <sup>1\*</sup>

<sup>1</sup>Department of Chemistry, King Fahd University of Petroleum and Minerals, Dhahran 31261, Kingdom of Saudi Arabia

#### Corresponding author:

(Prof. M.R.S.A. Janjua) [Janjua@kfupm.edu.sa](mailto:Janjua@kfupm.edu.sa)

Contact: +966 55 044 2019 +92 300 660 49 48

.....  
**Table S1:** Spin state of all studied systems.

| System                               | Spin state |
|--------------------------------------|------------|
| F@ B <sub>12</sub> P <sub>12</sub>   | Singlet    |
| Sc-B <sub>12</sub> P <sub>12</sub>   | Singlet    |
| F@Sc-B <sub>12</sub> P <sub>12</sub> | Doublet    |
| Ti-B <sub>12</sub> P <sub>12</sub>   | Singlet    |
| F@Ti-B <sub>12</sub> P <sub>12</sub> | Doublet    |
| V-B <sub>12</sub> P <sub>12</sub>    | Doublet    |
| F@V-B <sub>12</sub> P <sub>12</sub>  | Singlet    |
| Cr-B <sub>12</sub> P <sub>12</sub>   | Doublet    |
| F@Cr-B <sub>12</sub> P <sub>12</sub> | Doublet    |
| Mn-B <sub>12</sub> P <sub>12</sub>   | Singlet    |
| F@Mn-B <sub>12</sub> P <sub>12</sub> | Singlet    |
| Fe-B <sub>12</sub> P <sub>12</sub>   | Doublet    |
| F@Fe-B <sub>12</sub> P <sub>12</sub> | Singlet    |
| Co-B <sub>12</sub> P <sub>12</sub>   | Singlet    |
| F@Co-B <sub>12</sub> P <sub>12</sub> | Singlet    |
| Ni-B <sub>12</sub> P <sub>12</sub>   | Doublet    |
| F@Ni-B <sub>12</sub> P <sub>12</sub> | Singlet    |
| Cu-B <sub>12</sub> P <sub>12</sub>   | Doublet    |
| F@Cu-B <sub>12</sub> P <sub>12</sub> | Doublet    |
| Zn-B <sub>12</sub> P <sub>12</sub>   | Doublet    |
| F@Zn-B <sub>12</sub> P <sub>12</sub> | Singlet    |

Table S1 expressed the spin states of the studied systems. From table, it is clearly indicated that studied systems are quite stable in singlet and doublet state. Furthermore, no imaginary frequency is noted for studied systems which suggested that studied systems are at true global minima.
